# Supplementary material for: High serum C-reactive protein levels predict survival in patients with treated advanced lung adenocarcinoma
Source: PubMed Central journal article supplement — J Thorac Dis. 2021 Mar;13(3):1476–84. doi: 10.21037/jtd-20-3123 (PMC8024849; doi:10.21037/jtd-20-3123), 2021-03
Supplement: jtd-13-03-1476-dss.pdf [file jtd-13-03-1476-dss.pdf]

## Data Sharing Statement

|                     |                                                                                                                                                    |                                                                                                                                                                                                           |
|---------------------|----------------------------------------------------------------------------------------------------------------------------------------------------|-----------------------------------------------------------------------------------------------------------------------------------------------------------------------------------------------------------|
| <b>Article Info</b> | http://dx.doi.org/10.21037/jtd-20-3123.                                                                                                            |                                                                                                                                                                                                           |
| <b>Item</b>         | <b>Question</b>                                                                                                                                    | <b>Authors' Response<br/>(place "-" if not applicable)</b>                                                                                                                                                |
| 1                   | Would you like to share data collected for your study to others?                                                                                   | Yes                                                                                                                                                                                                       |
| 2                   | If not, would you like to share the reason for your decision?                                                                                      | -                                                                                                                                                                                                         |
| 3                   | What data in particular will be shared?                                                                                                            | The survival data in particular will be shared, and we also found high CRP levels predicted a lack of response to treatment in patients with advanced lung adenocarcinoma with or without EGFR mutations. |
| 4                   | Any other documents will be share? Such as study protocol, statistical analysis plan, informed consent form, clinical study report, analytic code. | Statistical analysis plan and clinical study report will also be shared if requested.                                                                                                                     |
| 5                   | When will data availability begin?                                                                                                                 | From the publication date.                                                                                                                                                                                |
| 6                   | When will data availability end?                                                                                                                   | Two years within the publication date, since the survival date may be updated over time.                                                                                                                  |
| 7                   | To whom will you share the data?                                                                                                                   | Medical oncologists                                                                                                                                                                                       |
| 8                   | For what type of analysis or purpose?                                                                                                              | For analysis to evaluate the clinical utility of C-reactive protein (CRP) levels measured at the time of diagnosis in advanced lung adenocarcinoma.                                                       |
| 9                   | How or where can the data/documents be obtained?                                                                                                   | Emails could be sent to the address below to obtain the shared data:<br>takamasa@med.shimane-u.ac.jp                                                                                                      |
| 10                  | Any other restrictions?                                                                                                                            | We may balance the potential benefits and risks for each request and then provide the data that could be shared.                                                                                          |
